# Supplementary material for: Terahertz absorption of illuminated photosynthetic reaction center solution: a signature of photoactivation?
Source: Royal Society of Chemistry journal article supplement (doi:10.1039/c4ra03787a), 2014-01-01
Supplement: c4ra03787a1.pdf [file c4ra03787a1.pdf]

## Supplementary figures

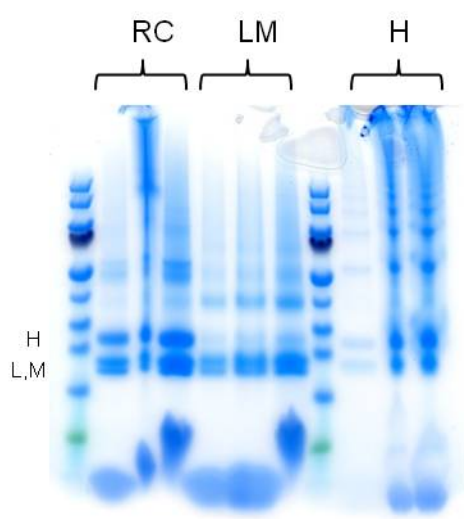

**Figure S1.** Picture of SDS-PAGE gel for the preparation of the LM-complex from purified RC.

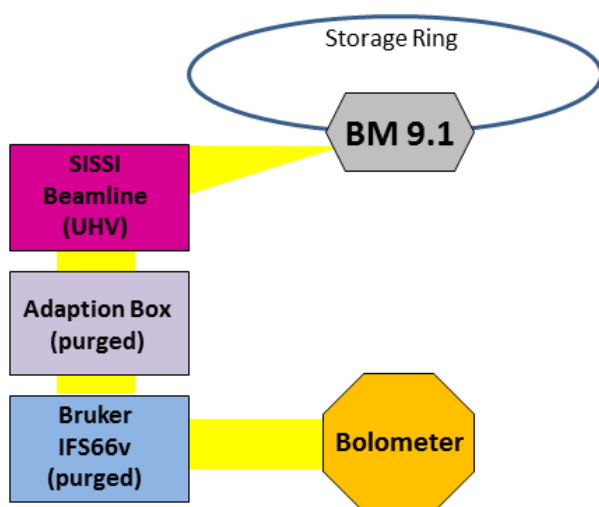

**Figure S2.** Schematic description of the SISSI beamline.

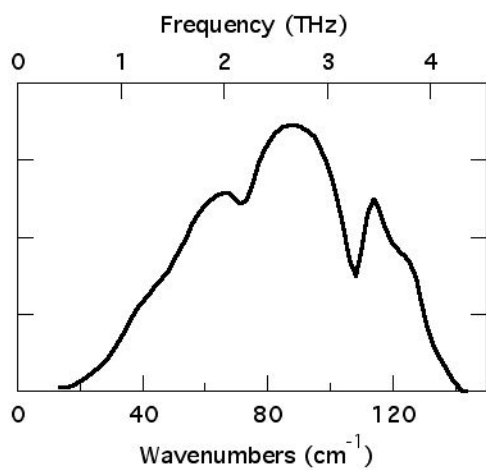

**Figure S3.** Spectrum of recorded THz radiation at the SISSI beamline with the described detector configuration.
